# Supplementary material for: Prediction of Early Distant Recurrence in Upfront Resectable Pancreatic Adenocarcinoma: A Multidisciplinary, Machine Learning-Based Approach
Source: MDPI journal article supplement (doi:10.3390/cancers13194938), 2021-09-30
Supplement: s1 [file s1]

## SUPPLEMENTARY MATERIALS

### Prediction Of Early Distant Recurrence In Upfront Resectable Pancreatic Adenocarcinoma: A Multidisciplinary, Machine Learning-Based Approach

Diego Palumbo; Martina Mori; Francesco Prato; Stefano Crippa; Giulio Belfiori; Michele Reni; Junaid Mushtaq;  
Francesca Aleotti; Giorgia Guazzarotti; Roberta Cao; Stephanie Steidler; Domenico Tamburrino; Emiliano Spezi;  
Antonella Del Vecchio; Stefano Cascinu; Massimo Falconi; Claudio Fiorino; Francesco De Cobelli

**Table S1.** Pathological variables selected for collection.

|                                    |                                                 |                          |
|------------------------------------|-------------------------------------------------|--------------------------|
| <b>Tumor size</b>                  | absolute value (mm)                             | <b>PATHOLOGICAL DATA</b> |
| <b>Final R status</b>              | 0 - R0; 1 - R1; 2 - R2                          |                          |
| <b>Lamina (PV/SMA margin)</b>      | 0 - Negative; 1 - Positive                      |                          |
| <b>Lymphovascular Invasion</b>     | 0 - No; 1 - Yes                                 |                          |
| <b>Perineural Invasion</b>         | 0 - No; 1 - Yes                                 |                          |
| <b>Peripancreatic Fat Invasion</b> | 0 - No; 1 - Yes                                 |                          |
| <b>Grading</b>                     | 1 - well; 2 - mod; 3 - scarcely; 4 - anaplastic |                          |
| <b>T</b>                           | AJCC 8 ed*                                      |                          |
| <b>N</b>                           | AJCC 8 ed*                                      |                          |
| <b>LN Harvested</b>                | absolute value                                  |                          |
| <b>LN Positive</b>                 | absolute value                                  |                          |
| <b>LNR</b>                         | absolute value                                  |                          |

LNR, lymphnode ratio; LN, lymphnode, PV, portal vein, SMA, superior mesenteric artery  
\*Chun, Y.S., Pawlik, T.M. & Vauthey, J.N. 8th Edition of the AJCC Cancer Staging Manual: Pancreas and Hepatobiliary Cancers. Ann Surg Oncol 25, 845–847 (2018).

**Table S2.** Clinical variables selected for collection.

|                           |                                        |                           |
|---------------------------|----------------------------------------|---------------------------|
| <b>Ca 19.9</b>            | U/mL                                   | <b>CLINICAL VARIABLES</b> |
| <b>Age at diagnosis</b>   | years                                  |                           |
| <b>Sex</b>                | 0 - Male; 1 - Female                   |                           |
| <b>Adjuvant treatment</b> | Adjuvant chemoterapy (0 - No; 1 - Yes) |                           |
|                           | Type of treatment                      |                           |
|                           | Adjuvant radioterapy (0 - No; 1 - Yes) |                           |

**Table S3.** Radiological variables selected for collection.

|                           |                                          |                               |
|---------------------------|------------------------------------------|-------------------------------|
| <b>Tumor Density (HU)</b> | Basal HU (absolute value)                | <b>RADIOLOGICAL VARIABLES</b> |
|                           | Arterial HU (absolute value)             |                               |
|                           | Venous HU (absolute value)               |                               |
|                           | Arterial/basal HU ratio (absolute value) |                               |
|                           | Venous/basal HU ratio (absolute value)   |                               |
|                           | Location (Head vs. uncinate process)     |                               |
| <b>General</b>            |                                          |                               |

|                                  |                                                                              |
|----------------------------------|------------------------------------------------------------------------------|
| <b>Vascular invasion*</b>        | Size (absolute value, mm)                                                    |
|                                  | Necrosis (0 - No; 1 - Yes)                                                   |
|                                  | Peripheral enhancement (0 - No; 1 - Yes)                                     |
|                                  | Capsulated (0 - No; 1 - Yes)                                                 |
|                                  | Hypodense on arterial phase (0 - No; 1 - Yes)                                |
|                                  | Isodense on arterial phase (0 - No; 1 - Yes)                                 |
|                                  | Hyperdense on arterial phase (0 - No; 1 - Yes)                               |
|                                  | Hypodense on venous phase (0 - No; 1 - Yes)                                  |
|                                  | Isodense on venous phase (0 - No; 1 - Yes)                                   |
|                                  | Hyperdense on venous phase (0 - No; 1 - Yes)                                 |
|                                  | Lymphadenopathies (0 - No; 1 - Yes)                                          |
|                                  | Fat stranding (0 - No; 1 - Yes)                                              |
|                                  | SMA contact (0 - No; 1 - Yes)                                                |
|                                  | Celiac Axis Contact (0 - <180 °; 1 - >180 °)                                 |
|                                  | CHA Contact (0 - <180 °; 1 - >180 °)                                         |
|                                  | Extension to the celiac axis (0 - <180 °; 1 - >180 °)                        |
|                                  | Extension to the bifurcation of right/left hepatic artery (0 - No; 1 - Yes)  |
|                                  | Arterial Variant (0 - No; 1 - Yes)                                           |
|                                  | MPV Contact (0 - <180 °; 1 - >180 °)                                         |
|                                  | SMV Contact (0 - <180 °; 1 - >180 °)                                         |
| <b>Extrapancreatic extension</b> | Extension to the most proximal veins draining into the SMV (0 - No; 1 - Yes) |
|                                  | Thrombus within vein (0 - No; 1 - Yes)                                       |
|                                  | Venous collaterals (0 - No; 1 - Yes)                                         |
|                                  | Duodenal invasion (0 - No; 1 - Yes)                                          |
|                                  | Biliary invasion (0 - No; 1 - Yes)                                           |
|                                  | Retroperitoneal lamina invasion (0 - No; 1 - Yes)                            |
|                                  | Portal invasion (0 - No; 1 - Yes)                                            |
| <b>Perineural invasion</b>       | Arterial invasion (0 - No; 1 - Yes)                                          |
|                                  | Invasion of nearby parenchymal organs (0 - No; 1 - Yes)                      |
|                                  | 1st plexus capitalis (0 - No; 1 - Yes)                                       |
|                                  | 2nd plexus capitalis (0 - No; 1 - Yes)                                       |
|                                  | Anterior pathway (0 - No; 1 - Yes)                                           |
|                                  | Root of mesentery pathway (0 - No; 1 - Yes)                                  |
|                                  | Number of plexi involved                                                     |

*PV*, portal vein; *SMA*, superior mesenteric artery; *CHA*, common hepatic artery; *MPV*, mesenteric portal vein; *SMV*, superior mesenteric vein; *CA*, celiac axis  
 \**NCCN*.  
*NCCN Clinical Practice Guidelines in Oncology. Pancreatic Adenocarcinoma. NCCN Guidelines. (2019).*

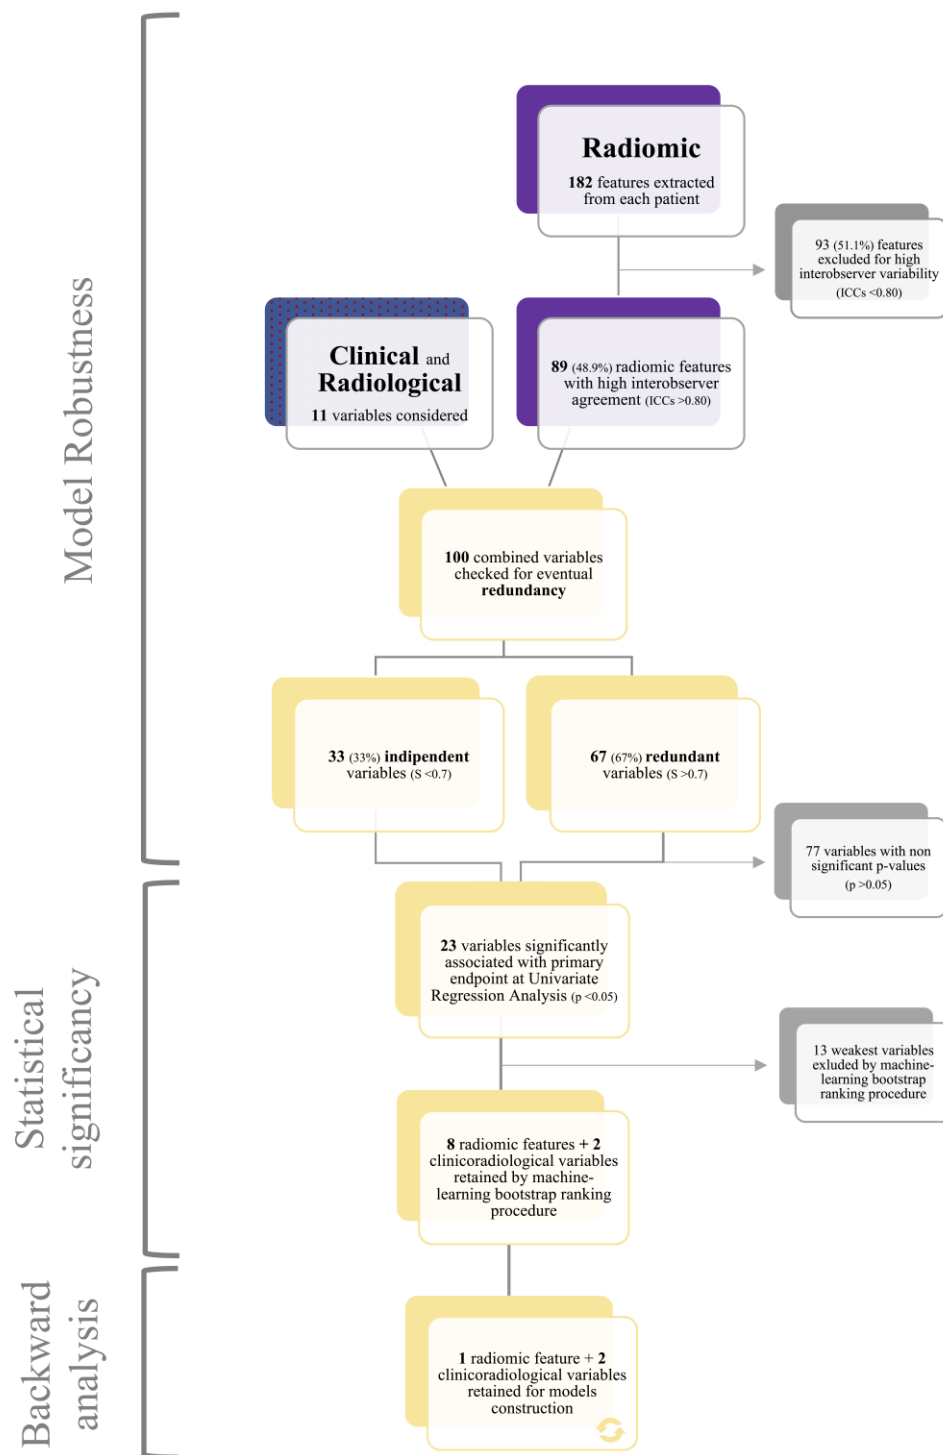

**Figure S1.** Variables selection workflow.
